# Supplementary material for: Moxetumomab pasudotox in heavily pre-treated patients with relapsed/refractory hairy cell leukemia (HCL): long-term follow-up from the pivotal trial
Source: Springer Nature journal article supplement (doi:10.1186/s13045-020-01004-y), 2021-02-24
Supplement: MOESM1 [file 18899194]

Subjects screened<sup>a</sup>  
N=89

Screening failures  
n=9

|                                           |   |
|-------------------------------------------|---|
| Did not meet inclusion/exclusion criteria | 6 |
| Administrative failure                    | 2 |
| Intercurrent infection                    | 1 |

Moxetumomab pasudtox 40 $\mu$ g/kg  
N=80

Completed treatment<sup>b</sup>  
n=50

Did not complete  
study treatment  
n=30

|                                 |    |
|---------------------------------|----|
| Adverse events                  | 12 |
| Death                           | 1  |
| Progressive disease             | 2  |
| Lack of benefit                 | 3  |
| Complete response, MRD-negative | 12 |

End of study status

|                                    |    |
|------------------------------------|----|
| Completed study phase <sup>c</sup> | 37 |
| Withdrawal of consent              | 3  |
| Death                              | 4  |
| Lost to follow-up                  | 2  |
| Other                              | 34 |
| Started new therapy                | 17 |
| Progression of disease             | 13 |
| Adverse events                     | 3  |
| Lack of response                   | 1  |
