# Supplementary material for: Moxetumomab pasudotox in heavily pre-treated patients with relapsed/refractory hairy cell leukemia (HCL): long-term follow-up from the pivotal trial
Source: Springer Nature journal article supplement (doi:10.1186/s13045-020-01004-y), 2021-02-24
Supplement: MOESM4 [file 18899194]

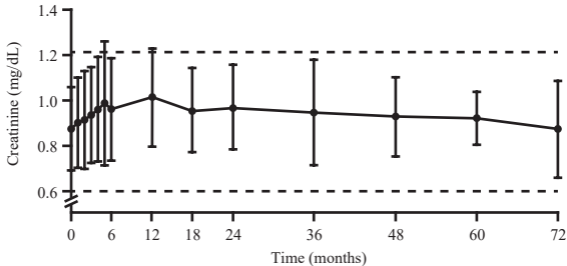

No. of patients: 80

55

30

52

41

35

13

4

4
